# Supplementary material for: Copper peroxide coated upconversion nanoparticle modified with glucose oxidase for H2O2self-supplying starvation-enhanced chemodynamic therapyin vitro
Source: Royal Society of Chemistry journal article supplement (doi:10.1039/d2dt00163b), 2022-01-01
Supplement: d2dt00163b1.pdf [file d2dt00163b1.pdf]

## Supporting Information

### The copper peroxide coated upconversion nanoparticle modified with glucose oxidase for H<sub>2</sub>O<sub>2</sub> self-supplying starvation-enhanced chemodynamic therapy *in vitro*

**Yale Hong,<sup>‡,ab</sup> Qinfeng Tao,<sup>‡,b</sup> Yuan-Yuan Liu,<sup>c</sup> Zhuo Wang,<sup>d</sup> Haifang Wang<sup>\*c</sup>  
and Lining Sun<sup>\*ab</sup>**

<sup>a</sup> Department of Chemistry, College of Sciences, Shanghai University, Shanghai 200444, China. E-mail: [lnsun@shu.edu.cn](mailto:lnsun@shu.edu.cn)

<sup>b</sup> Research Center of Nano Science and Technology, College of Sciences, Shanghai University, Shanghai 200444, China.

<sup>c</sup> Institute of Nanochemistry and Nanobiology, School of Environmental and Chemical Engineering, Shanghai University, Shanghai 200444, China. E-mail: [hwang@shu.edu.cn](mailto:hwang@shu.edu.cn)

<sup>d</sup> State Key Laboratory of Marine Resource Utilization in South China Sea & Special Glass Key Lab of Hainan Province, School of Information and Communication Engineering, Hainan University, Haikou 570228, China.

<sup>‡</sup>These authors contributed equally to this work.

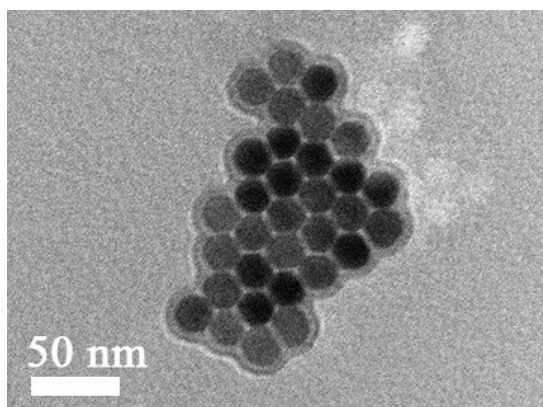

**Fig. S1.** Transmission electron microscopy (TEM) image of the UCN@CuO<sub>2</sub> (denoted as UCCu).

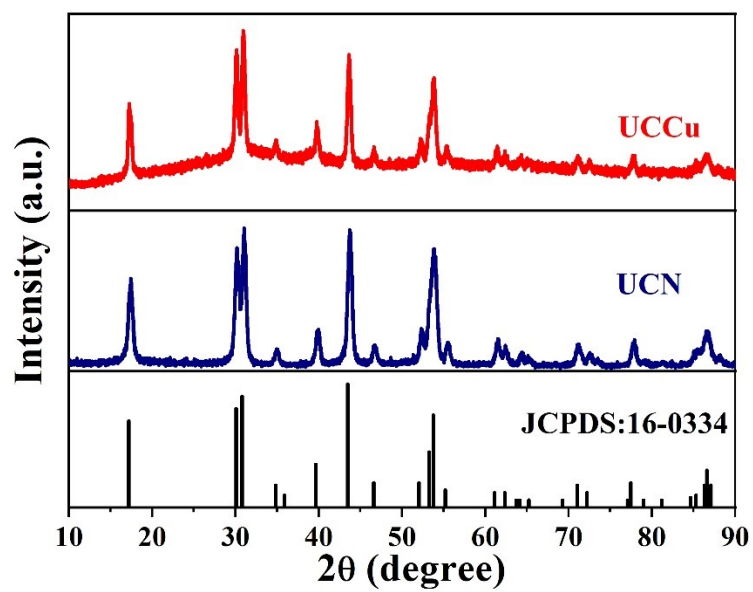

**Fig. S2.** X-ray diffraction patterns of UCN and UCCu, and standard XRD pattern of NaYF<sub>4</sub> (JCPDS: 16-0334).

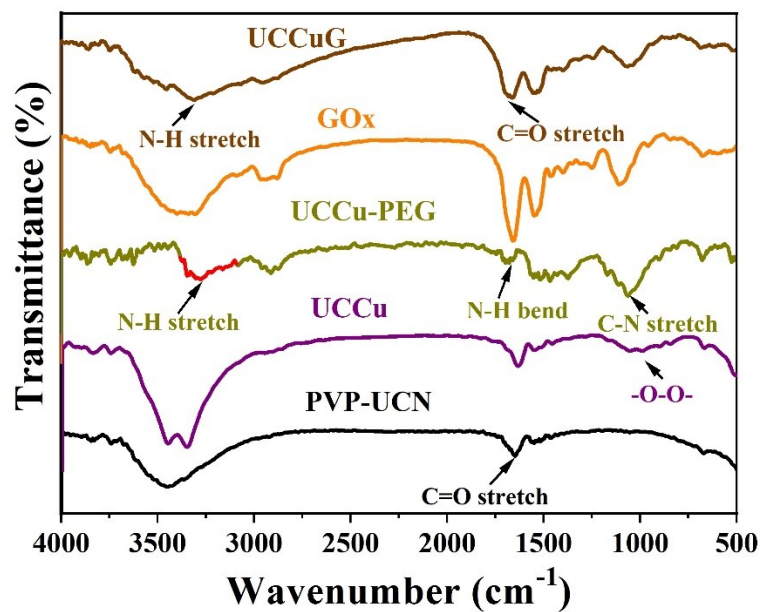

**Fig. S3.** Fourier transform infrared (FTIR) spectra of PVP-UCN, UCCu, UCCu-PEG, GOx, and UCCuG nanocomposite.

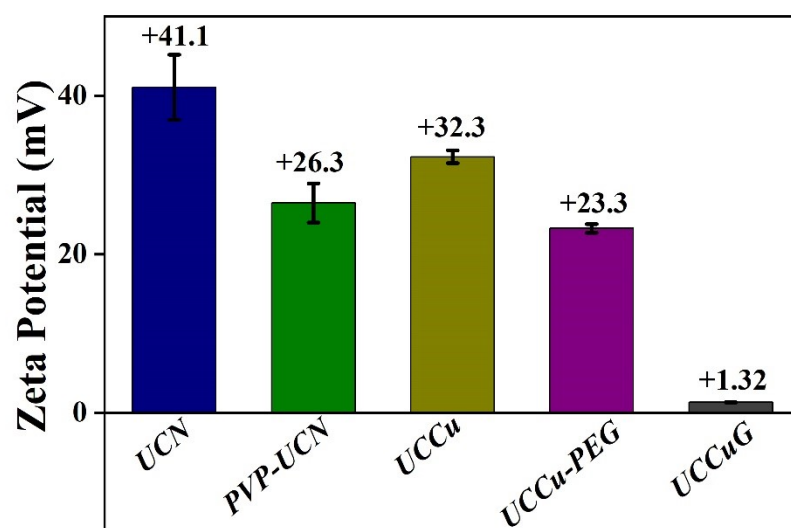

**Fig. S4.** Zeta potentials of UCN, PVP-UCN, UCCu, UCCu-PEG, and UCCuG nanocomposite.

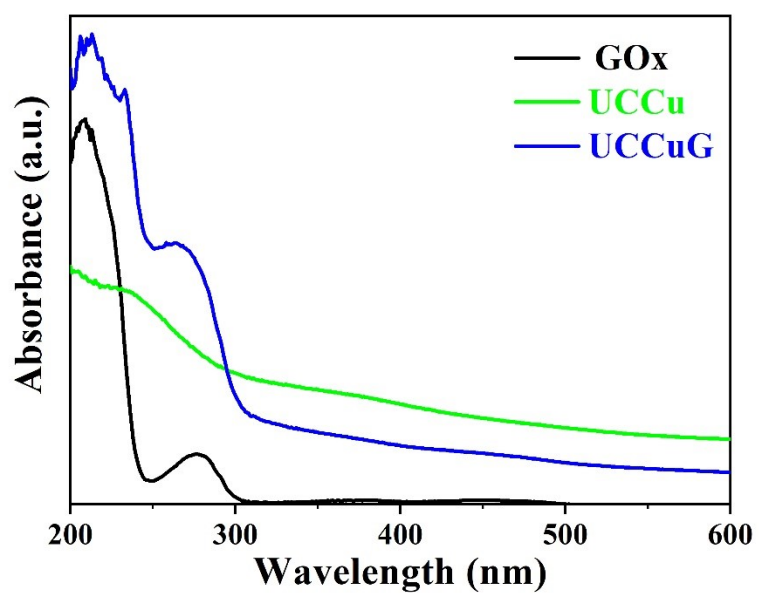

**Fig. S5.** UV-Vis absorption spectra of GOx, UCCu, and UCCuG nanocomposite.

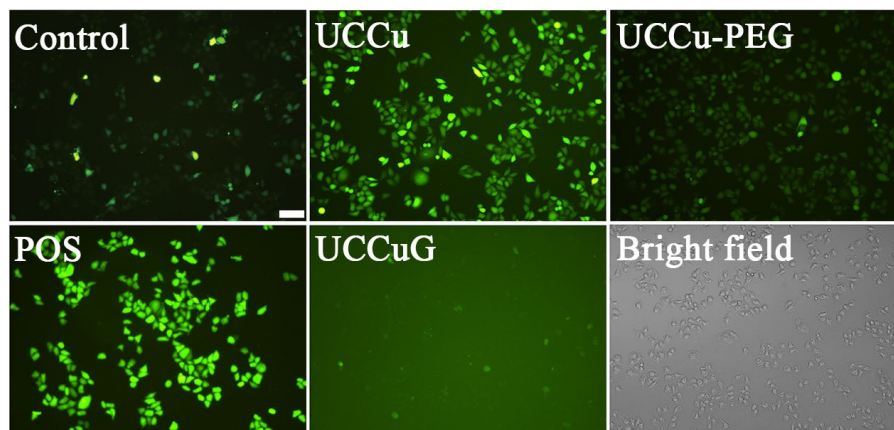

**Fig. S6.** Fluorescence images of intracellular reactive oxygen species (ROS) production in HeLa cells incubated with different treatments (UCCu, UCCu-PEG, UCCuG nanocomposite, and bright field image of cells treated with UCCuG nanocomposite) with the concentration of 50  $\mu\text{g}/\text{mL}$  for 4 h; the HeLa cells untreated are used as the control group and those treated with 0.15%  $\text{H}_2\text{O}_2$  for 30 min are used as the positive control (named as POS). Scale bar: 100  $\mu\text{m}$ .

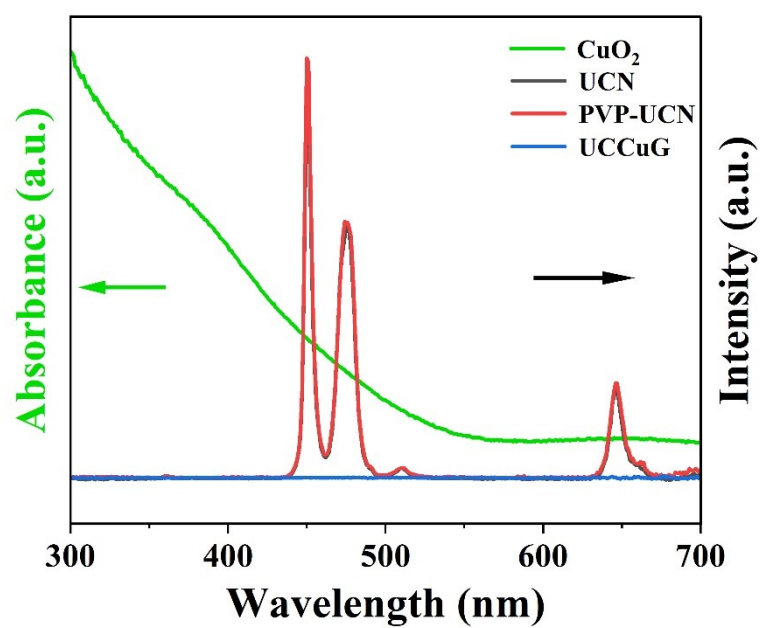

**Fig. S7.** The UV-Vis absorption spectrum of CuO<sub>2</sub> and the upconversion luminescence spectra of UCN, PVP-UCN, and UCCuG nanocomposite ( $\lambda_{\text{ex}} = 980 \text{ nm}$ ).
